# Supplementary material for: Effects of dietary methionine and cysteine restriction on plasma biomarkers, serum fibroblast growth factor 21, and adipose tissue gene expression in women with overweight or obesity: a double-blind randomized controlled pilot study
Source: PubMed Central journal article supplement (PMC7065370; doi:10.1186/s12967-020-02288-x), 2020-03-11

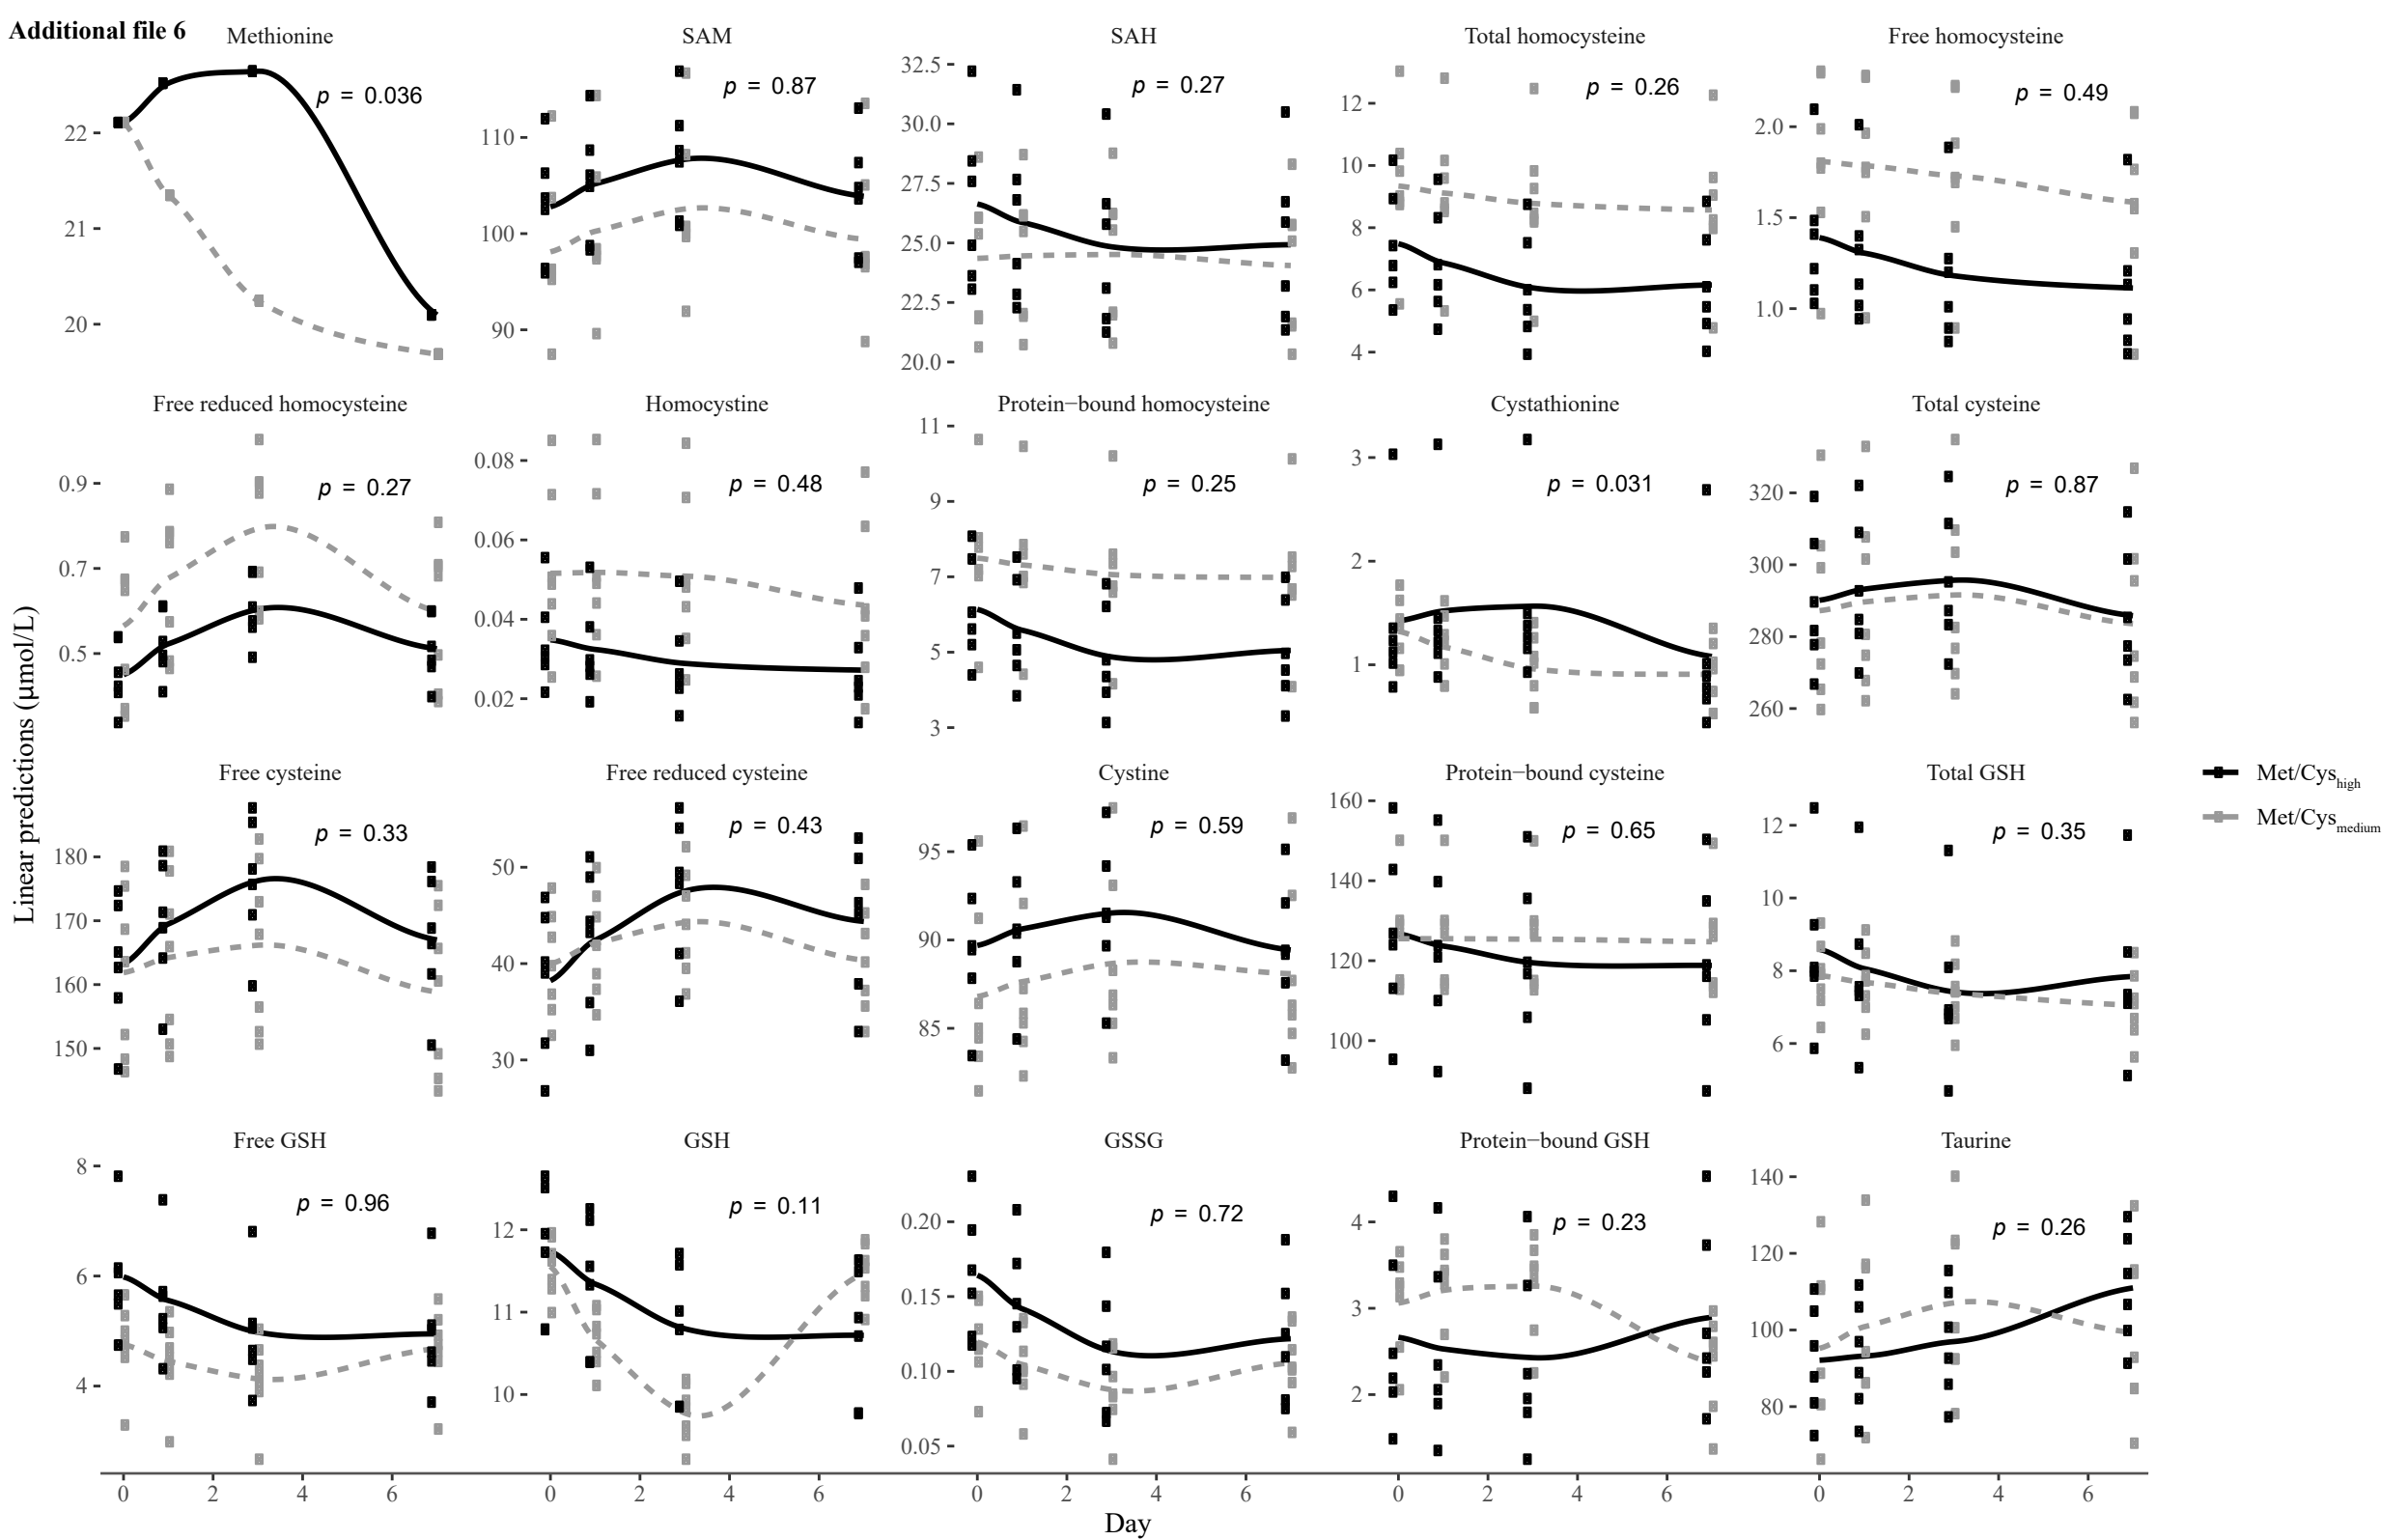

Supplement: 12967_2020_2288_MOESM6_ESM.pdf [file 12967_2020_2288_MOESM6_ESM.pdf]
