# Supplementary material for: Effects of dietary methionine and cysteine restriction on plasma biomarkers, serum fibroblast growth factor 21, and adipose tissue gene expression in women with overweight or obesity: a double-blind randomized controlled pilot study
Source: PubMed Central journal article supplement (PMC7065370; doi:10.1186/s12967-020-02288-x), 2020-03-11
Supplement: 12967_2020_2288_MOESM12_ESM.pdf [file 12967_2020_2288_MOESM12_ESM.pdf]

*MTR*

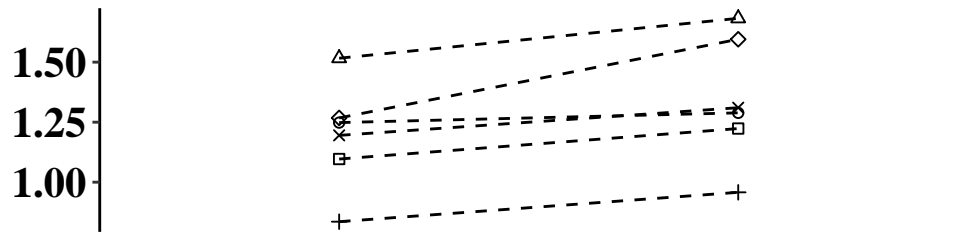

*GCLC*

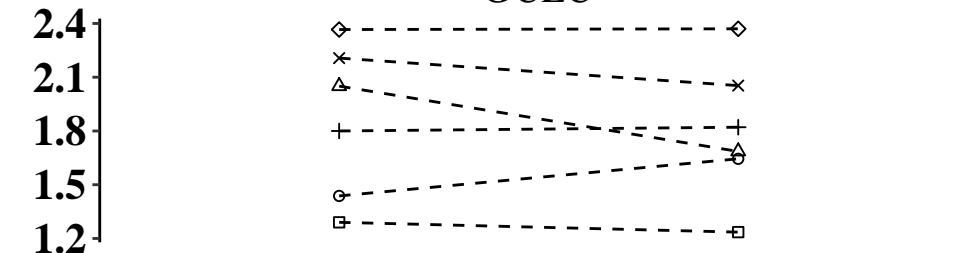

*ACACA*

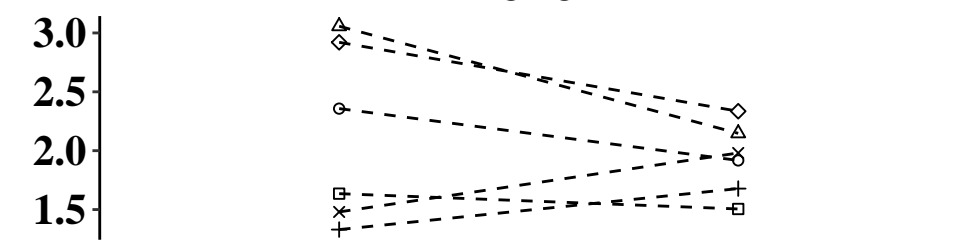

*SCD1*

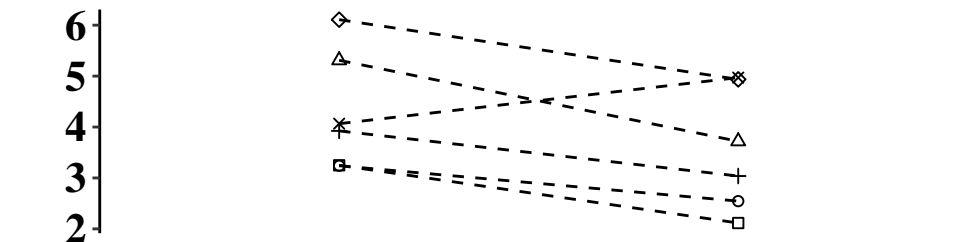

*MTOR*

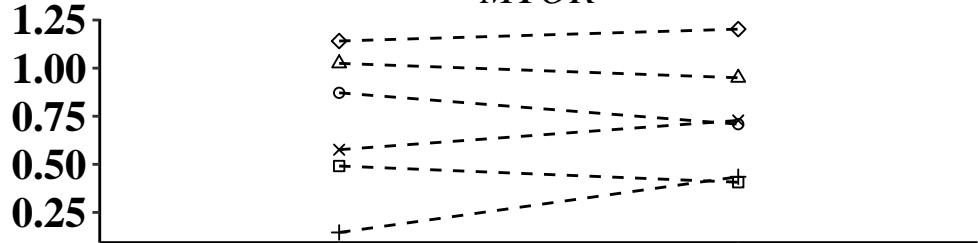

V1 V4

*CBS*

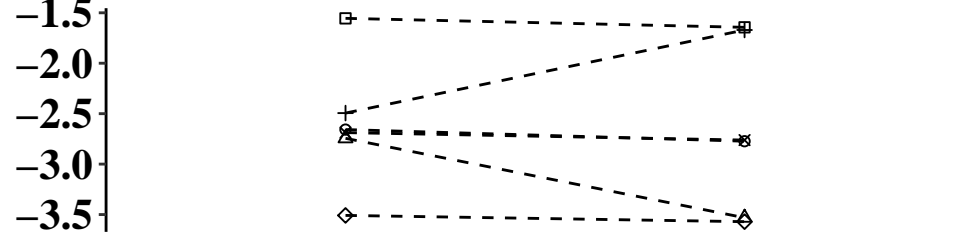

*GCLM*

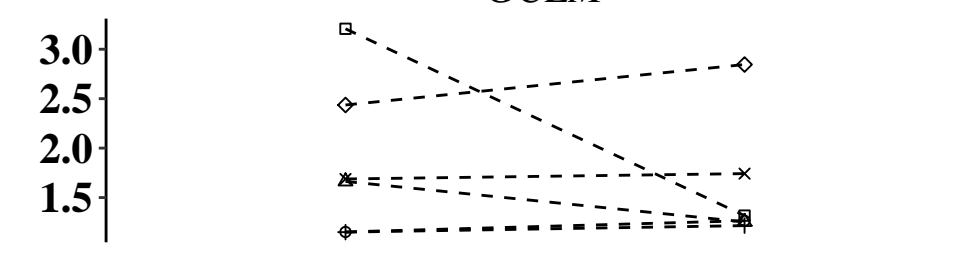

*FASN*

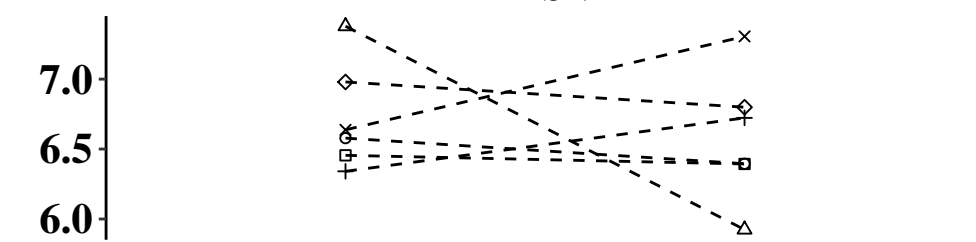

*SREBP*

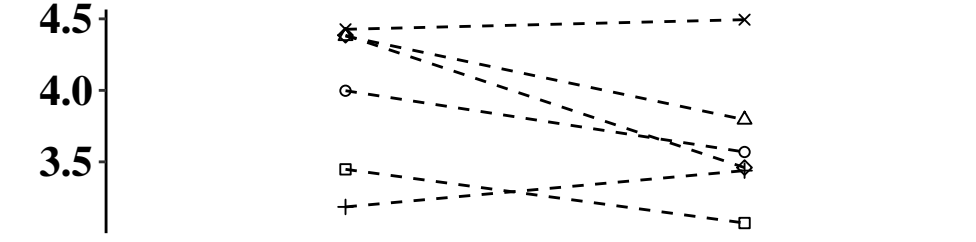

*LEP*

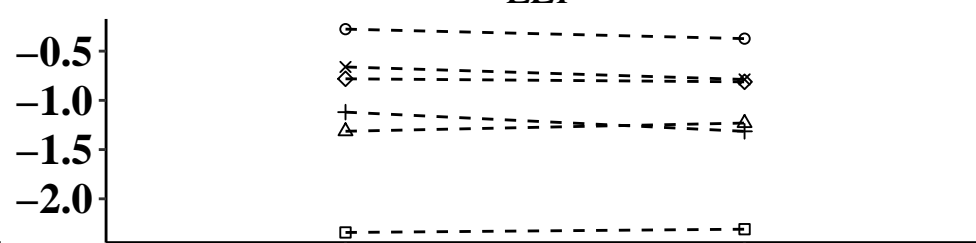

V1 V4

*CDO*

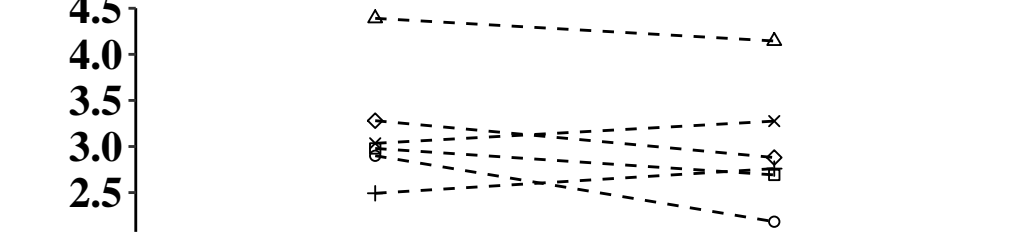

*CPT1A*

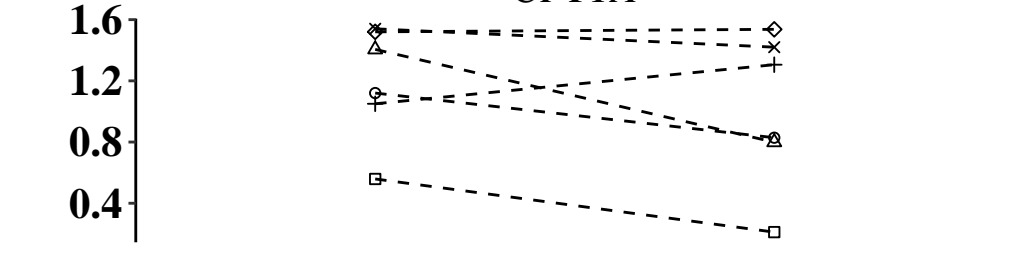

*DGAT1*

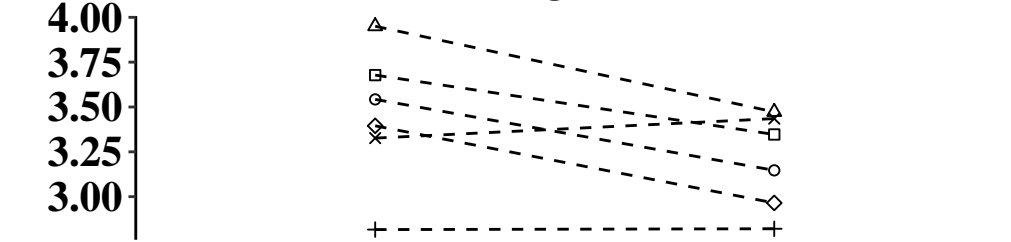

*PPARG*

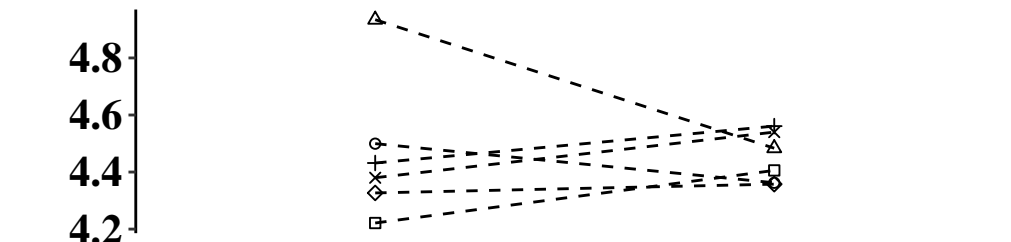

*PRDM16*

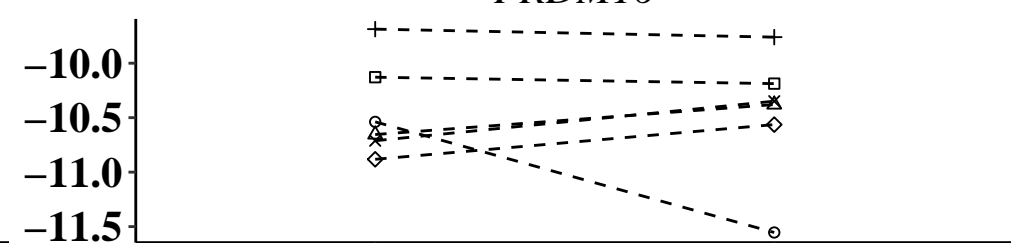

V1 V4
